# Supplementary material for: Irreversible temperature gating in trpv1 sheds light on channel activation
Source: eLife. 2018 Jun 5;7:e36372. doi: 10.7554/eLife.36372 (PMC5999395; doi:10.7554/eLife.36372)
Supplement: Figure 1—source data 1. [file elife-36372-fig1-data1.xlsx]

## Sheet: Hoja1
	Figure 1F
	Enthalpy (Kcal●mol-1)
	Up-ramp	Down-ramp
	55.58	12.68
	76.97	17.46
	86.67	19.42
	90	24.5
	93.88	25.65
	100.41	28.1
	121.1	40.13
