# Supplementary material for: Irreversible temperature gating in trpv1 sheds light on channel activation
Source: eLife. 2018 Jun 5;7:e36372. doi: 10.7554/eLife.36372 (PMC5999395; doi:10.7554/eLife.36372)
Supplement: Figure 2—source data 1. [file elife-36372-fig2-data1.xlsx]

## Sheet: Hoja1
	Figure 2C
I temp = temperature activated current	Ramps 51-53°C
I leak = leak current	Patch number	1				2				3				4				5				6				7				8				9				10				11				12
I = I temp - I leak	Time (s)	I temp (A)	I Leak (A)	I (A)	I/Imax	I temp (A)	I Leak (A)	I (A)	I/Imax	I temp (A)	I Leak (A)	I (A)	I/Imax	I temp (A)	I Leak (A)	I (A)	I/Imax	I temp (A)	I Leak (A)	I (A)	I/Imax	I temp (A)	I Leak (A)	I (A)	I/Imax	I temp (A)	I Leak (A)	I (A)	I/Imax	I temp (A)	I Leak (A)	I (A)	I/Imax	I temp (A)	I Leak (A)	I (A)	I/Imax	I temp (A)	I Leak (A)	I (A)	I/Imax	I temp (A)	I Leak (A)	I (A)	I/Imax	I temp (A)	I Leak (A)	I (A)	I/Imax
I/Imax = normalized current to maximum current	0	3.728e-09	2.7344e-11	3.7e-09	1	3.5166e-09	1.5469e-10	3.36e-09	1	1.4101e-09	3.6313e-11	1.37e-09	1	2.6478e-09	6.1094e-11	2.58e-09	1	2.1781e-09	2.9375e-11	2.14e-09	1	1.2542e-09	3.1562e-11	1.22e-09	1	1.2841e-09	4.9531e-11	1.23e-09	1	1.814e-09	4.4844e-11	1.76e-09	1	3.2994e-09	1.6953e-10	3.12987e-09	1	2.6923e-09	2.3172e-10	2.4605e-09	1	2.6922e-09	5.2656e-11	2.63954e-09	1	2.4461e-09	1.1734e-10	2.32e-09	1
	30	3.53e-09	4.01e-11	3.49e-09	0.9439	2.9875e-09	2.0047e-10	2.78e-09	0.829	1.3291e-09	4.4688e-11	1.3e-09	0.9495	2.0738e-09	8.2969e-11	1.99e-09	0.7696	2.1522e-09	2.5156e-11	2.12e-09	0.9899	9.5947e-09	1.7187e-11	9.42e-10	0.7706	1.1327e-09	5.8125e-11	1.0745e-09	0.8704	1.5836e-09	5.5625e-11	1.52e-09	0.8636	1.5728e-09	1.5297e-10	1.41983e-09	0.4536	1.5794e-09	8.7344e-11	1.49e-09	0.6063	8.8953e-10	6.1094e-11	8.28436e-10	0.3138	1.9302e-09	2.3063e-10	1.69e-09	0.7298
	60	3.33e-09	4.06e-11	3.29e-09	0.88894	2.7083e-09	2.1391e-10	2.4943e-09	0.7419	1.138e-09	2.4625e-11	1.11e-09	0.8104	1.7494e-09	1.0406e-10	1.64e-09	0.636	2.4528e-09	3.625e-11	2.41e-09	1.1246	1.0233e-09	2.9063e-11	9.94e-10	0.8131	1.1119e-09	8.5e-11	1.02e-09	0.8317	1.1837e-09	5.3594e-11	1.3e-09	0.6387	8.5688e-10	1.2672e-10	7.3016e-10	0.2321	7.9374e-10	8.8906e-11	7.04e-10	0.2864	3.1391e-10	5.75e-11	2.5641e-10	0.0978	9.3516e-10	2.4078e-10	6.94e-10	0.2981
	90					2.1038e-10	1.6859e-10	1.9352e-09	0.5756	1.1559e-09	2.8688e-11	1.12e-09	0.8205	1.4991e-09	1.2672e-10	1.37e-09	0.5305	2.3053e-09	3.0156e-11	2.27e-09	1.0588	9.3266e-10	3.2031e-11	9e-10	0.7366	8.4234e-10	1.2547e-10	7.1687e-10	0.5806	7.4406e-10	4.0312e-11	7.03e-10	0.3977	4.6969e-10	1.0406e-10	3.6563e-10	0.1136	4.5453e-10	6.5312e-11	3.89e-10	0.1581	3.7516e-10	9.5156e-11	2.80004e-10	0.106	4.5922e-10	1.7859e-10	2.8e-10	0.1205
	120									9.6325e-10	2.6813e-11	9.36e-10	0.6816	1.2264e-09	1.3969e-10	1.08e-09	0.4201	2.1611e-09	3.2969e-11	2.12e-09	0.9904	8.2641e-10	3.9062e-11	7.87e-10	0.6439	7.4234e-10	1.4328e-10	5.99e-10	0.4852	5.2031e-10	4.625e-11	4.74e-10	0.2679	3.3437e-10	9.4844e-11	2.39526e-10	0.0783	2.6844e-10	7.25e-11	1.95e-10	0.0796					3.0797e-10	9.1094e-11	2.16e-10	0.0931
	150									9.1869e-10	4.8062e-11	8.7e-10	0.6337					2.2225e-09	4.4844e-11	2.17e-09	1.0113	7.6109e-10	3.6719e-11	7.24e-10	0.5924	5.7328e-10	1.5469e-10	4.18e-10	0.339	3.5594e-10	5.0469e-11	3.05e-10	0.1726	2.8875e-10	8.6719e-11	2.02031e-10	0.0645	2.1656e-10	6.1562e-11	1.54e-10	0.0629					2.3391e-10	7.8594e-11	1.55e-10	0.0666
	180																	1.87e-09	5.5469e-09	1.81e-09	0.8444	6.9813e-10	4.0469e-11	6.57e-10	0.5379	4.7453e-10	1.4641e-10	3.28e-10	0.2657	2.8e-10	4.1406e-11	2.38e-10	0.1348
	210																	1.7198e-09	5.5e-11	1.66e-09	0.7747	4.9281e-10	3.2812e-11	4.59e-10	0.3762	3.1328e-10	1.2984e-10	1.83e-10	0.1485
	Ramps 51-53°C
	Patch number	1				2				3				4				5				6
	Time (s)	I temp (A)	I Leak (A)	I (A)	I/Imax	I temp (A)	I Leak (A)	I (A)	I/Imax	I temp (A)	I Leak (A)	I (A)	I/Imax	I temp (A)	I Leak (A)	I (A)	I/Imax	I temp (A)	I Leak (A)	I (A)	I/Imax	I temp (A)	I Leak (A)	I (A)	I/Imax	Average	SD	Error
	0	1.8879e-09	2.3906e-10	1.64e-09	1	1.6734e-09	8.125e-12	1.66e-09	1	7.35e-10	6.25e-12	7.28e-10	1	3.6087e-09	4.2344e-12	3.56e-09	1	5.9328e-10	2.75e-11	5.65e-10	1	2.2181e-09	1.6062e-10	2.05e-09	1	1	0	0
	180	1.3011e-09	1.7719e-10	1.12e-09	0.681678	6.4062e-11	1.3281e-11	5.07e-11	0.0304941	1.2937e-10	1.8281e-11	1.11e-10	0.152438	1.5483e-09	3.4219e-10	1.2e-09	0.338191	1.7672e-10	9.0156e-11	8.65e-11	0.152999	7.6656e-10	1.95e-10	5.71e-10	0.277796	0.272266	0.22761	0.0929215
	360	4.1656e-10	1.2609e-10	2.9e-10	0.176177	1.3141e-10	2.75e-11	1.03e-10	0.0623981	2.9594e-10	3.8437e-11	2.57e-10	0.353349	9.3672e-10	2.9187e-10	6.44e-10	0.180815	1.7766e-10	5.7969e-11	1.19e-10	0.21155	3.4969e-10	1.6594e-10	1.83e-10	0.0893083	0.178933	0.103062	0.0420749
	540	1.8516e-10	6.1562e-11	1.23e-10	0.0749651					3.1375e-10	5.4219e-11	2.59e-10	0.356132	4.0016e-10	2.9141e-10	1.08e-10	0.0304933					3.8219e-10	1.6594e-10	2.16e-10	0.105104	0.141674	0.14622	0.0731099
	720									3.4641e-10	7.3906e-11	2.72e-10	0.373933	3.0359e-10	1.3656e-10	1.67e-10	0.0468349					3.6281e-10	1.6938e-10	1.93e-10	0.0940131	0.171594	0.176812	0.102082
	Ramps 47-49 °C
	Patch number	1				2				3				4
	Time (s)	I temp (A)	I Leak (A)	I (A)	I/Imax	I temp (A)	I Leak (A)	I (A)	I/Imax	I temp (A)	I Leak (A)	I (A)	I/Imax	I temp (A)	I Leak (A)	I (A)	I/Imax	Average	SD	Error
	0	1.2754e-09	4.3e-11	1.23e-09	1	1.15e-09	5.2813e-11	1.09e-09	1	6.7375e-10	9.3375e-11	5.8e-10	1	8.2706e-10	1.0331e-10	7.23e-10	1	1	0	0
	300	1.076e-09	6.4437e-11	1.01e-09	0.820807	8.9953e-10	8.3281e-11	8.16e-10	0.743947	5.9587e-10	9.9938e-11	4.94e-10	0.85278	6.2326e-10	5.1875e-11	5.71e-10	0.789478	0.801753	0.0464005	0.0232002
	600	7.2556e-10	5.3938e-11	6.71e-10	0.544971	5.844e-10	7.7344e-11	5.07e-10	0.462142	4.6287e-10	8.9187e-11	3.73e-10	0.643865	3.3788e-10	3.4188e-11	3.03e-10	0.419609	0.517647	0.0989442	0.0494721
	900	4.85e-10	7.0156e-11	4.14e-10	0.336615	3.4047e-10	4.4844e-11	2.95e-10	0.26944	4e-10	9.225e-11	3.07e-10	0.530261					0.378772	0.135425	0.0781874
	1200	3.4078e-10	6.1406e-11	2.79e-10	0.226691	2.5156e-10	5.5e-11	1.96e-10	0.179149	3.3263e-10	8.8438e-11	2.44e-10	0.420749					0.27553	0.12799	0.0738953
	Ramps 41-43°C
	Patch number	1				2				3				4				5				6				7
	Time (s)	I temp (A)	I Leak (A)	I (A)	I/Imax	I temp (A)	I Leak (A)	I (A)	I/Imax	I temp (A)	I Leak (A)	I (A)	I/Imax	I temp (A)	I Leak (A)	I (A)	I/Imax	I temp (A)	I Leak (A)	I (A)	I/Imax	I temp (A)	I Leak (A)	I (A)	I/Imax	I temp (A)	I Leak (A)	I (A)	I/Imax	Average	SD	Error
	0	9.3656e-10	2.5187e-10	6.84e-10	1	2.1833e-09	1.2484e-10	2.05e-09	1	1.4717e-09	2.9375e-11	1.44e-09	1	4.2094e-10	5.87e-11	3.62e-10	1	1.3183e-09	1.4625e-10	1.17e-09	1	1.0278e-09	5.3438e-11	9.74e-10	1	8.7172e-10	1.5e-11	8.56e-10	1	1	0	0
	180	8.95e-10	2.6891e-10	6.26e-10	0.914414	2.0773e-09	1.9606e-10	1.88e-09	0.913907	1.5198e-09	5.2031e-11	1.46e-09	1.0176	3.3719e-10	5.4531e-11	2.82e-10	0.7803	1.2644e-09	1.875e-10	1.07e-09	0.918817	1.1169e-09	1.0297e-10	1.01e-09	1.04061	7.6953e-10	4.2969e-11	7.26e-10	0.848073	0.919103	0.090209	0.0340958
	360	9.0594e-10	2.974e-10	6.08e-10	0.888636	1.9728e-09	2.6656e-10	1.7e-09	0.828892	1.6355e-09	1.4031e-10	1.49e-09	1.0366	2.8094e-10	5e-11	2.3e-10	0.6375	8.9e-10	2.6828e-10	6.21e-10	0.530455	1.1633e-09	1.3422e-10	1.02e-09	1.05616					0.829707	0.211685	0.0864201
	540	9.1313e-10	2.5406e-10	6.59e-10	0.962582	1.9247e-09	3.5281e-10	1.57e-09	0.763624					2.2844e-10	4.6094e-11	1.82e-10	0.5033	8.4438e-10	2.2813e-10	6.16e-10	0.525788	1.2623e-09	1.8453e-10	1.07e-09	1.10613					0.772285	0.264978	0.118502
	720	8.6672e-10	2.75e-10	5.91e-10	0.864216	2.2572e-09	3.9375e-10	1.86e-09	0.905264									6.5812e-10	1.6687e-10	4.91e-10	0.419137	1.4059e-09	1.8828e-10	1.21e-09	1.24966					0.859569	0.340715	0.170357
	900	7.8969e-10	2.6208e-10	5.27e-10	0.770582	2.17e-09	4.2125e-10	1.74e-09	0.849543									6.15e-10	1.3172e-10	4.83e-10	0.412337	1.2041e-09	2.1078e-10	9.93e-10	1.01946					0.76298	0.255787	0.127894
	1080	8.2703e-10	2.7984e-10	5.47e-10	0.799179													5.7656e-10	1.4859e-10	4.27e-10	0.365147	1.2591e-09	2.8281e-10	9.76e-10	1.00198					0.722101	0.325338	0.187834
	Figure 2E
	Enthalpy (Kcal•mol-1)
	Minus 60 mV	60 mV
	90.83	55.58
	110.68	76.97
	115.56	86.67
	133.46	90
	154.13	93.88
	184.72	100.41
	194.88	121.1
	Figure 2F
	Time (s)	I/Imax	Current of each patch (pA)
	0	1	-1049	-583	-1031	-584	-1536
	30	0.3315	-3048	-160	-183	-119	-758
	60	0.2343	-194	-89	-100	-70	-948
	90	0.2104	-120	-64	-73	-68	-682
[truncated: 15 more columns]
