# Supplementary material for: Irreversible temperature gating in trpv1 sheds light on channel activation
Source: eLife. 2018 Jun 5;7:e36372. doi: 10.7554/eLife.36372 (PMC5999395; doi:10.7554/eLife.36372)
Supplement: Figure 3—source data 1. [file elife-36372-fig3-data1.xlsx]

## Sheet: Hoja1
	Figure 3C
I temp = temperature activated current		1st ramp @ 22 ° C				1st ramp @ 10 °C				4th ramp @ 22 ° C				4th ramp @ 10 °C				2 min @ 22 ° C				2 min @ 10 ° C
I leak = leak current	Patch number	I temp (A)	I Leak (A)	I (A)	I/Imax	I temp (A)	I Leak (A)	I (A)	I/Imax	I temp (A)	I Leak (A)	I (A)	I/Imax	I temp (A)	I Leak (A)	I (A)	I/Imax	I temp (A)	I Leak (A)	I (A)	I/Imax	I temp (A)	I Leak (A)	I (A)	I/Imax
I = I temp - I leak	1	1.2966e-09	4.5e-11	1.2516e-09	1	5.3056e-10	9.375e-12	5.2118e-10	1	4.5094e-10	9.2813e-11	3.5812e-10	0.2861	3.3106e-10	5.3125e-11	2.7793e-10	0.5332	3.5188e-10	1.103e-10	2.4158e-10	0.193	1.3806e-10	2.3125e-11	1.1493e-10	0.2205
I/Imax = normalized current to maximum current	2	1.0512e-09	3.375e-11	1.0175e-09	1	2.35e-10	2.8594e-11	2.064e-10	1	1.2719e-10	3.7187e-11	9.0003e-11	0.0884	1.5484e-10	2.625e-11	1.2858e-10	0.6229	1.325e-10	4.5625e-11	8.6875e-11	0.0853	1.0266e-10	2.4531e-11	7.8129e-11	0.3785
	3	1.7719e-09	2.3125e-11	1.7487e-09	1	7.3891e-10	7.1875e-12	7.3172e-10	1	7.4781e-10	1.6531e-10	5.825e-10	0.333	2.3594e-10	9.0625e-12	2.2687e-10	0.31	5e-10	9.8125e-11	4.0187e-10	0.2298	1.8969e-10	9.8437e-12	1.7984e-10	0.2457
	4	1.7859e-09	3e-11	1.7559e-09	1	2.5484e-10	4.2187e-12	2.5062e-10	1	7.025e-10	5.7813e-11	6.4468e-10	0.3671	9.8438e-11	1.8594e-11	7.9844e-11	0.3185	4.8344e-10	6.3125e-11	4.2031e-10	0.2393	8.3125e-11	1.4844e-11	6.2881e-11	0.2724
	5	3.9125e-10	5.625e-12	3.8562e-10	1	1.7447e-09	5.9375e-12	1.7387e-09	1	9.9063e-11	9.6875e-12	8.9375e-11	0.2317	2.2594e-10	3.5937e-11	1.9e-10	0.1092	8.6875e-11	1.5312e-11	7.1563e-11	0.1855	1.4281e-10	2.5938e-11	1.1687e-10	0.0672
	6					6.65e-10	9.1875e-11	5.7312e-10	1					2.2094e-10	2.4375e-11	1.9656e-10	0.3429					1.4094e-10	1.7187e-11	1.2375e-10	0.2159
	Average				1				1				0.26126				0.372783				0.18658				0.233367
	SD				0				0				0.109225				0.181961				0.0611298				0.100818
	Error				0				0				0.0488468				0.0742854				0.0273381				0.0411588
	Figure 3F
		1st ramp @ 22 ° C				1st ramp @ 10 ° C				2nd ramp @ 22 ° C				2nd ramp @10 ° C				2 min @ 22 °C				2 min @ 10° C
	Patch number	I temp (A)	I Leak (A)	I (A)	I/Imax	I temp (A)	I Leak (A)	I (A)	I/Imax	I temp (A)	I Leak (A)	I (A)	I/Imax	I temp (A)	I Leak (A)	I (A)	I/Imax	I temp (A)	I Leak (A)	I (A)	I/Imax	I temp (A)	I Leak (A)	I (A)	I/Imax
	1	5.9219e-10	3.5625e-11	5.5656e-10	1	5.6312e-10	2.1563e-11	5.4155e-10	1	5.8437e-11	1.8125e-11	4.0312e-11	0.0724	1.6453e-10	3.75e-11	1.2703e-10	0.2345	5e-11	1.875e-11	3.125e-11	0.0561	3.0625e-10	7.5156e-11	2.3109e-10	0.4267
	2	5.8219e-10	1.1875e-11	5.7031e-10	1	9.2516e-10	2.6875e-11	8.9828e-10	1	5.875e-11	1.4375e-11	4.4375e-11	0.0778	1.0078e-10	3.9687e-11	6.1093e-11	0.068	1.5687e-10	3.3125e-11	1.2374e-10	0.2169	1.85e-10	7.7031e-11	1.0796	0.1201
	3	1.4809e-09	3.6562e-11	1.4443e-09	1	5.7359e-10	5.3125e-12	5.6827e-10	1	1.1e-10	2.875e-11	8.125e-11	0.0562	1.0766e-10	1.9219e-11	8.8441e-11	0.1556	3.9531e-10	1.175e-10	2.7781e-10	0.1923	1.7422e-10	2.3906e-11	1.5031e-10	0.2645
	4	1.9522e-09	1.5469e-10	1.7975e-09	1					4.9031e-10	1.5437e-10	3.3594e-10	0.1868					4.3531e-10	1.5812e-10	2.7719e-10	0.1542
	5	7.6438e-10	1.5e-11	7.4938e-10	1					1.2969e-10	2.625e-11	1.0344e-10	0.138					9.8125e-11	2e-11	7.8125e-11	0.1042
	Average				1				1				0.10624				0.1527				0.14474				0.270433
	SD				0				0				0.0546731				0.0832879				0.0653052				0.153386
	Error				0				0				0.0244506				0.0480863				0.0292054				0.0885575
	Figure 3I
		Initial 0 mV				Initial -60 mV				Remaining 0 mV				Remaining -60 mV				After 20 min @ 0 mV				After 20 min @ -60 mV
	Patch number	I temp (A)	I Leak (A)	I (A)	I/Imax	I temp (A)	I Leak (A)	I (A)	I/Imax	I temp (A)	I Leak (A)	I (A)	I/Imax	I temp (A)	I Leak (A)	I (A)	I/Imax	I temp (A)	I Leak (A)	I (A)	I/Imax	I temp (A)	I Leak (A)	I (A)	I/Imax
	1	1.3934e-09	2.6563e-11	1.3668e-09	1	7.2969e-10	1.0406e-10	6.2563e-10	1	2.8531e-10	6.375e-11	2.2156e-10	0.162	4.1656e-10	1.3031e-10	2.8625e-10	0.4575	1.9844e-10	7.4375e-11	1.2406e-10	0.0907	5.25e-10	1.8344e-10	3.4156e-10	0.5459
	2	3.3906e-10	8.75e-12	3.3031e-10	1	2.0469e-09	3.8125e-11	2.0087e-09	1	1.0938e-10	1.375e-11	9.563e-11	0.2895	4.7781e-10	7.8125e-11	3.9968e-10	0.1989	1.85e-10	2.9063e-11	1.5593e-10	0.472	7.3594e-10	2.6594e-10	4.7e-10	0.2339
	3	3.3031e-10	6.875e-12	3.2343e-10	1	3.5625e-10	5.625e-12	3.5062e-10	1	2.2438e-10	3.2812e-11	1.9156e-10	0.5922	1.4375e-10	1.2188e-11	1.3156e-10	0.3752	2.4687e-10	3.5e-11	2.1187e-10	0.655	1.2969e-10	2e-11	1.0969e-10	0.3128
	4	1.2159e-09	1.4375e-11	1.2015e-09	1				1	5.65e-10	1.375e-10	4.275e-10	0.3557					5.2e-10	7.5e-11	4.45e-10	0.3703
	5	4.3297e-09	2.0625e-11	4.309e-09	1				1	4.4063e-10	7.0625e-11	3.7e-10	0.0858					6.4594e-10	2.55e-10	3.9094e-10	0.0907
	Average				1				1				0.29704				0.343867				0.33574				0.3642
	SD				0				0				0.19588				0.132117				0.245854				0.162227
	Error				0				0				0.0876001				0.0762776				0.109949				0.0936616

## Sheet: Hoja2
	Figure 3F
