# Supplementary material for: Irreversible temperature gating in trpv1 sheds light on channel activation
Source: eLife. 2018 Jun 5;7:e36372. doi: 10.7554/eLife.36372 (PMC5999395; doi:10.7554/eLife.36372)
Supplement: Figure 4—source data 1. [file elife-36372-fig4-data1.xlsx]

## Sheet: Hoja1
	Figure 4B
	Fractional capsaicin current	Fraction inactivated
	0.1524	0.2847
	0.147	0.7247
	0.0153	0.7936
	0.0266	0.9436
	0.0332	0.8331
